# Supplementary material
Source: MDPI journal article supplement (https://www.mdpi.com/2071-1050/8/11/1199)
Supplement: s1 [file s1]

## Supplementary Materials: Emerging Development Pathways of Urban Livestock Production in Rapidly Growing West Africa Cities

Regina Roessler, Serge E. Mpouam, Tichaona Muchemwa and Eva Schlecht

**Table S1.** Potential classification variables for two-step cluster analysis (% for nominal, mean  $\pm$  standard deviation for continuous variables).

| Potential Variable                 | Ouagadougou ( <i>n</i> = 157)                                                                | Tamale ( <i>n</i> = 175)                                                                     | Selected for catPCA <sup>2</sup> | Selected for Two-Step Cluster Analysis <sup>3</sup> |
|------------------------------------|----------------------------------------------------------------------------------------------|----------------------------------------------------------------------------------------------|----------------------------------|-----------------------------------------------------|
| Location                           | Urban: 26.8<br>Peri-urban: 73.2                                                              | Urban: 57.1<br>Peri-urban: 42.9                                                              | OUA, TAM                         | OUA, TAM                                            |
| Age of household head (years)      | 51.9 $\pm$ 12.01                                                                             | 50.4 $\pm$ 12.86                                                                             | OUA, TAM                         | -                                                   |
| Education of household head        | No education: 54.8<br>Primary school: 21.7<br>Secondary school: 14.7<br>Tertiary school: 8.9 | No education: 54.3<br>Primary school: 8.6<br>Secondary school: 28.0<br>Tertiary school: 19.4 | OUA, TAM                         | OUA                                                 |
| Household member ( <i>n</i> )      | 9.8 $\pm$ 5.88                                                                               | 13.9 $\pm$ 8.51                                                                              | OUA, TAM                         | -                                                   |
| Ethnicity of household head        | Mossi: 71.3<br>Fulani: 24.2<br>Other: 4.4                                                    | Not considered<br>(93.1% Dagomba, others $\leq$ 1%)                                          | OUA                              | OUA                                                 |
| Migrated                           | Not migrated: 63.3<br>Migrated: 36.7                                                         | Not considered                                                                               | OUA                              | OUA                                                 |
| Livestock main occupation          | No: 86.6<br>Yes: 13.4                                                                        | No: 92.5<br>Yes: 7.5                                                                         | OUA, TAM                         | -                                                   |
| Crop production                    | No: 29.3<br>Yes: 70.7                                                                        | No: 21.7<br>Yes: 78.3                                                                        | OUA, TAM                         | TAM                                                 |
| Farm time (years)                  | 14.5 $\pm$ 11.35                                                                             | Not considered                                                                               | OUA                              |                                                     |
| Labor use for livestock activities | Family labor only: 61.8<br>Hired labor only: 8.3<br>Family and hired labor: 29.9             | No hired labor: 74.3<br>Hired labor: 25.7                                                    | OUA, TAM                         | OUA, TAM                                            |
| Cows and heifers ( <i>n</i> )      | 8.2 $\pm$ 12.32                                                                              | Not considered                                                                               | -                                | -                                                   |

Table S1. Cont.

| Potential Variable                                   | Ouagadougou ( <i>n</i> = 157) | Tamale ( <i>n</i> = 175) | Selected for catPCA <sup>2</sup> | Selected for Two-Step Cluster Analysis <sup>3</sup> |
|------------------------------------------------------|-------------------------------|--------------------------|----------------------------------|-----------------------------------------------------|
| Cattle ( <i>n</i> )                                  | Not considered                | 11.0 ± 19.72             | TAM                              | TAM                                                 |
| Goats ( <i>n</i> )                                   | 7.5 ± 10.60                   | 7.1 ± 8.85               | OUA, TAM                         | -                                                   |
| Sheep ( <i>n</i> )                                   | 11.8 ± 14.41                  | 10.6 ± 11.43             | OUA, TAM                         | -                                                   |
| Pigs ( <i>n</i> )                                    | 9.3 ± 18.84                   | 0.8 ± 3.90               | OUA, TAM                         | OUA                                                 |
| Local chickens, guinea fowl ( <i>n</i> )             | 25.4 ± 27.69                  | 21.0 ± 28.55             | OUA                              |                                                     |
| Mating controlled (natural, AI)                      | No: 47.1<br>Yes: 52.9         | Not considered           | OUA                              | OUA                                                 |
| Animals confined (stall, shelter, fence)             | No: 45.2<br>Yes: 54.8         | No: 31.1<br>Yes: 68.9    | OUA, TAM                         | -                                                   |
| Transhumance of cattle                               | No: 62.4<br>Yes: 37.5         | Not applicable           | OUA                              | OUA                                                 |
| Milk sales                                           | No: 69.4<br>Yes: 30.6         | No: 86.3<br>Yes: 13.7    | OUA, TAM                         | OUA, TAM                                            |
| Egg sales                                            | No: 71.3<br>Yes: 28.7         | No: 75.4<br>Yes: 24.6    | OUA, TAM                         |                                                     |
| Average daily milk production in 2013 (kg/household) | 7.9 ± 26.17                   | 1.6 ± 3.83               | TAM                              | TAM                                                 |
| Average daily milk sales in 2013 (kg/household)      | 6.7 ± 25.87                   | 0.8 ± 2.50               | OUA                              | -                                                   |
| Livestock sales in 2013 (TLU <sup>1</sup> )          | 3.2 ± 3.84                    | 1.6 ± 0.37               | OUA, TAM                         | OUA                                                 |

Table S1. Cont.

| Potential Variable    | Ouagadougou ( <i>n</i> = 157)                                                                                                               | Tamale ( <i>n</i> = 175)                                                                      | Selected for catPCA <sup>2</sup> | Selected for Two-Step Cluster Analysis <sup>3</sup> |
|-----------------------|---------------------------------------------------------------------------------------------------------------------------------------------|-----------------------------------------------------------------------------------------------|----------------------------------|-----------------------------------------------------|
| Manure use            | Manure thrown away: 7.0<br>Used on farm: 58.0<br>Manure sold: 17.8<br>Manure given away: 9.6<br>Multiple uses: 7.6                          | Manure thrown away: 12.6<br>Used on farm: 71.3<br>Manure exchanged: 9.2<br>Multiple uses: 6.9 | TAM                              | TAM                                                 |
| Feeding method cattle | Stall-fed: 5.6<br>Pasture: 67.3<br>Tethered: 2.8<br>Stall-fed and pasture: 17.8<br>Stall-fed and tethered: 2.8<br>Pasture and tethered: 3.7 | No feed purchased: 79.4<br>Feed purchased: 20.6                                               | OUA, TAM                         | OUA, TAM                                            |
| Feeding method goats  | Stall-fed: 6.8<br>Pasture: 46.6<br>Tethered: 4.1<br>Stall-fed and pasture: 5.5<br>Stall-fed and tethered: 1.4<br>Pasture and tethered: 35.6 | No feed purchased: 74.9<br>Feed purchased: 25.1                                               | OUA, TAM                         | OUA, TAM                                            |
| Feeding method sheep  | Stall-fed: 9.3<br>Pasture: 67.4<br>Tethered: 1.2<br>Stall-fed and pasture: 12.8<br>Stall-fed and tethered: 0.0<br>Pasture and tethered: 9.3 | No feed purchased: 57.1<br>Feed purchased: 42.9                                               | -                                | -                                                   |
| Feeding method pigs   | Stall: 57.4<br>Free range: 3.7<br>Stall and free range: 38.9                                                                                | No feed purchased: 94.8<br>Feed purchased: 5.2                                                | OUA, TAM                         | OUA                                                 |

<sup>1</sup> Tropical livestock unit (equivalent to 250 kg body weight), conversion factors used: 0.8 TLU for cattle, 0.1 TLU for sheep and goats, 0.2 TLU for pigs, 0.01 TLU for local poultry; <sup>2</sup> catPCA: categorical principal component analysis. The number of potential variables was gradually reduced. Spearman correlation tests,  $\eta^2$  statistics and Cramer's V were used to measure the association between variables, resulting in 20 (TAM) and 24 variables (OUA), respectively, that were selected for catPCA;

<sup>3</sup> Through catPCA, the number of variables for the two-step cluster analysis was further reduced to 9 (TAM) and 13 (OUA), using a loading score  $\geq 0.5$  on one of the two components as selection criterion.

**Table S2:** Controlled mating in different livestock species by (peri-) urban households (HH) in Ouagadougou (OUA;  $n = 157$ ) and Tamale (TAM;  $n = 172$ ).

|                          | HH with Cattle | Cattle <sup>a</sup> | HH with Sheep | Sheep   | HH with Goats | Goats   | HH with Pigs | Pigs    | HH with Local Poultry | Local Poultry |
|--------------------------|----------------|---------------------|---------------|---------|---------------|---------|--------------|---------|-----------------------|---------------|
| Cluster                  | <i>n</i>       | % of HH             | <i>n</i>      | % of HH | <i>n</i>      | % of HH | <i>n</i>     | % of HH | <i>n</i>              | % of HH       |
| OUA-1                    | 0              | NA                  | 18            | 27.8    | 20            | 10.0    | 38           | 52.6    | 30                    | 3.3           |
| OUA-2                    | 17             | 41.2                | 13            | 30.8    | 12            | 0.0     | 16           | 31.2    | 16                    | 0.0           |
| OUA-3                    | 54             | 40.7                | 42            | 26.2    | 34            | 20.6    | 0            | NA      | 48                    | 2.1           |
| OUA-4                    | 36             | 63.9                | 29            | 34.5    | 24            | 25.0    | 0            | NA      | 33                    | 0.0           |
| OUA                      | 99             | 48.6                | 102           | 29.4    | 90            | 16.7    | 54           | 46.3    | 127                   | 1.6           |
| <i>p</i> -value (OUA)    |                | 0.089               |               | 0.890   |               | 0.203   |              | 0.232   |                       | 0.802         |
| TAM-1                    | 29             | 10.3                | 48            | 4.2     | 33            | 0.0     | 0            | NA      | 29                    | 3.4           |
| TAM-2                    | 30             | 0.0                 | 28            | 0.0     | 26            | 0.0     | 0            | NA      | 21                    | 0.0           |
| TAM-3                    | 19             | 0.0                 | 32            | 3.1     | 22            | 0.0     | 0            | NA      | 26                    | 0.0           |
| TAM-4                    | 16             | 0.0                 | 31            | 0.0     | 30            | 0.0     | 10           | 70.0    | 30                    | 0.0           |
| TAM                      | 94             | 5.3                 | 139           | 2.2     | 111           | 0.0     | 10           | 70.0    | 106                   | 0.9           |
| <i>p</i> -value (TAM)    |                | 0.160               |               | 0.698   |               | -       |              | -       |                       | 0.717         |
| Both cities              | 201            | 28.4                | 241           | 13.7    | 201           | 7.5     | 64           | 50.0    | 233                   | 1.3           |
| <i>p</i> -value (cities) |                | <0.001              |               | <0.001  |               | <0.001  |              | 0.302   |                       | 1.000         |

<sup>a</sup> AI used by 12.7% of cattle keepers in OUA, of which 55% in OUA-3 and 35% in OUA-4. For definition of clusters see footnote of Table 1 and text.
